- A-231** Room C, 10/17/2000 2:00 PM - 4:00 PM (PS)  
**Reversal of Amiodarone-Induced Vasodilation by Nitric Oxide Pathway Inhibitors** Kenichi A. Tanaka, MD; Atsushi Tsuda, MD; Koji Yamaguchi, MD; Fania Szlam, MMS; Jerrold H. Levy, MD, *Anesthesiology, Emory University School of Medicine, Atlanta, GA, United States*. Pretreatment of the vasculature with methylene blue or L-NAME resulted in decrease or inhibition of relaxation, respectively.
- A-232** Room C, 10/17/2000 2:00 PM - 4:00 PM (PS)  
**Attenuating the Response to Intubation: Remifentanyl, Esmolol and Placebo** Menno F. TerRiet, MD; Miguel Cobas, MD; Jozsef Fabian, MD; Michael C. Lewis, MD; Gerard J.A. DeSouza, MD, *Anesthesiology, VA Medical Center/ University of Miami, Miami, FL, United States*. We compared placebo, remifentanyl and esmolol before intubation. Hypertension, not HR, was attenuated by remifentanyl. Esmolol affected neither.
- A-233** Room C, 10/17/2000 2:00 PM - 4:00 PM (PS)  
**Comparison of Acetylcholine and Trinitroglycerin Induced Vasodilation in Patients with Hypothermic Cardiopulmonary Bypass** Shinichi Yamada; Seiji Watanabe; Nobuya Hamada; Tatsubiko Kano, *Anesthesiology, Kurume University School of Medicine, Kurume, Fukuoka, Japan*. Deep hypothermia inhibits both endothelial and myogenic vasodilatation in patients with a constant CPB flow.
- A-234** Room C, 10/17/2000 2:00 PM - 4:00 PM (PS)  
**Does the Use of Gastroepiploic Artery for Coronary Artery Bypass Grafting Influence Gastric Intramucosal Perfusion?** Ken Yamaura, MD; Kozaburo Akiyoshi, MD; Kazuo Irita, MD; Takuro Taniyama, MD; Shosuke Takabashi, MD, *Anesthesiology, Kyushu University, Fukuoka, Japan*. CABG with a gastroepiploic artery did not affect gastric intramucosal pH (pHi) compared with conventional CABG.
- A-235** Room C, 10/17/2000 2:00 PM - 4:00 PM (PS)  
**Midazolam Abolished and Flumazenil Induced Ischemic Preconditioning in Cultured Cardiomyocytes** Zhenhai Yao, MD, PhD; Michael F. O'Connor, MD, *Department of Anesthesia and Critical Care, The University of Chicago, Chicago, IL, United States*. Benzodiazepine receptor play an important role in preconditioning.
- A-236** Room C, 10/17/2000 2:00 PM - 4:00 PM (PS)  
**Hemodynamic Responses to Tracheal Intubation in Patients with Complete Cord Injuries** Kyung Y. Yoo, M.D.; JongUn Lee, M.D.; Seongwook Jeong, M.D.; Sung S. Chung, *Anesthesiology, Chonnam National University Medical School, Kwangju, Korea*. Intubation elicited the tachycardiac but not the pressor response in cervical cord injured patients. However, it did not initiate an autonomic hyperreflexia.
- A-237** Room 302, 10/16/2000 2:00 PM - 3:30 PM (PD)  
**Hospital Readmission within One Year after Fast Track Cardiac Anesthesia: A Prospective Randomized Controlled Trial** D.C.H. Cheng, MD; C. Wall, MSc; R.A. Peragallo, MD; J.J. Bruce, MD; C.D. Naylor, MD, *Dept. of Anesthesia, Toronto General Hospital, U of Toronto, Canada*. FTCA circumvents transfers to rehab hospitals with no increased acute hospital readmission or LOS during one year follow up.
- A-238** Room 302, 10/16/2000 2:00 PM - 3:30 PM (PD)  
**Postoperative Use of Beta-Blockers Reduces Mortality at One Year in High Risk Surgical Patients** Elizabeth A. Martinez, MD; Lauren J. Kim, BA; Nauder Faraday, MD; Peter J. Pronovost, MD, PhD, *Anesthesiology/Critical Care Medicine, Johns Hopkins Medical Institutions, Baltimore, MD, United States*
- A-239** Room 302, 10/16/2000 2:00 PM - 3:30 PM (PD)  
**Relationship between Preoperative Risk Factors, Postoperative Length of Stay, Morbidity, Mortality and Hospital Costs in Coronary Bypass Surgery** Tuula S.O. Kurki; Unto Hakkinen; Jubani Ramo; Mauri Leijala, *National Research and Development Center for Welfare and Health, Helsinki, Finland*
- A-240** Room 302, 10/16/2000 2:00 PM - 3:30 PM (PD)  
**Association of Postop Peak & Fractional Serum Creatinine Change with Post-CABG Mortality** M. Stafford Smith, FRCP; D. Redden, MRCP; M. Neuman, MD; B. Phillips-Bute, PhD; M. Winn, MD, *Anesth, DUMC, Durham, NC, United States*. Independent associations of PostCr and %ΔCr with mortality & morbidity suggest that more than one mechanism is operative in the association of renal dysfunction & postCABG outcome
- A-241** Room 302, 10/16/2000 2:00 PM - 3:30 PM (PD)  
**Myocardial Function Changes One Year Following CABG Are Predicted with Intraoperative Dobutamine Stress Echocardiography** Frank W. Dupont, MD; Roberto Lang, MD, FACC; Kathie Dean; Melinda Drum, PhD; Solomon Aronson, MD, FACC, FCCP, *Anesthesia and Critical Care, University of Chicago, Chicago, IL, United States*. Response to intraoperative low dose dobutamine predicts myocardial function at 1 year following CABG surgery.
- A-242** Room 302, 10/16/2000 2:00 PM - 3:30 PM (PD)  
**Patient Outcome Following Major Vascular Surgery and Fast Track Anesthesia** Nikola Tchervenivanov, MD, MS; Hemant Ishwaran, PhD; David G. Whalley, MB, ChB, *Anesthesiology and Critical Care Medicine, Cleveland Clinic Foundation, Cleveland, OH, United States*. Fast-track anesthesia in major vascular surgery appears to shorten ICU length of stay and is associated with fewer pulmonary complications.
- A-243** Room 302, 10/16/2000 2:00 PM - 3:30 PM (PD)  
**Is ICU and Hospital Recovery after Off-Bypass (OPCAB) Superior to On-Bypass (CB) Revascularization?** Cathy Carbery, DPSCN; Carmel Wall, FFARCSI; Asghar Khabghani, FRCS; Mobammed Anrani, FRCS; David Royston, FRCA, *Anaesthesia, Royal Brompton and Harefield NHS Trust, United Kingdom*. Discharge after bypass-CABG with recovery plan was more rapid than OPCAB and standard management. Bleeding after OPCAB prolonged stay.
- A-244** Room 302, 10/16/2000 2:00 PM - 3:30 PM (PD)  
**Mortality in Cardiac Surgery: Comparison of the Tu Score to the Simplified Acute Physiology System II (SAPS II) and Attempt of Improvement of the Tu Score Predictive Value** Serge Ndoko, MD; Bruno Bourdarias, MD; Emmanuelle Bouzigon, MD; Genevieve Chene, MD; Gerard Janvier, MD, DAR 2, *Groupe Hospitalier Sud, Bordeaux-Pessac, France*. The Tu score was improved.

### Clinical Circulation: Outcomes I

- A-237** Room 302, 10/16/2000 2:00 PM - 3:30 PM (PD)  
**Hospital Readmission within One Year after Fast Track Cardiac Anesthesia: A Prospective Randomized Controlled Trial** D.C.H. Cheng, MD; C. Wall, MSc; R.A. Peragallo, MD; J.J. Bruce, MD; C.D. Naylor, MD, *Dept. of Anesthesia, Toronto General Hospital, U of Toronto, Canada*. FTCA circumvents transfers to rehab hospitals with no increased acute hospital readmission or LOS during one year follow up.
